# Supplementary material for: Pirfenidone in Idiopathic Pulmonary Fibrosis: Expert Panel Discussion on the Management of Drug-Related Adverse Events
Source: PubMed Central journal article supplement — Adv Ther. 2014 Mar 18;31(4):375–91. doi: 10.1007/s12325-014-0112-1 (PMC4003341; doi:10.1007/s12325-014-0112-1), 2014-03-18
Supplement: 12325_2014_112_MOESM1_ESM.pdf [file 12325_2014_112_MOESM1_ESM.pdf]

- Pirfenidone is currently the only approved therapy for slowing progression of idiopathic pulmonary fibrosis, a rare, progressive, irreversible, and ultimately fatal chronic lung disease.
- While pirfenidone is generally well tolerated, a minority of patients discontinue therapy due to gastrointestinal (GI) and skin-related adverse events (AEs).
- Animal studies suggest that GI AEs arise from pirfenidone's effect on reducing gastric emptying and small intestinal transit, while skin-related AEs are likely associated with pirfenidone's ability to absorb ultraviolet (UV) light.
- Optimizing AE management is key to maintaining patients on an optimal treatment dose.
- Recommendations to help prevent and/or mitigate GI and skin-related AEs include taking pirfenidone during (or right after) a meal, avoiding sun exposure, wearing protective clothing, and applying a broad-spectrum sunscreen with high UVA and UVB protection.

This summary slide represents the opinions of the authors. This manuscript is based on discussions between authors at a clinical advisory board which was supported by a grant from InterMune International AG, Basel, Switzerland. Medical writing assistance for this study was provided by Dominique Spirig, formerly of Fishawack Communications GmbH (Basel, Switzerland), Neil Burton of Fishawack Communications GmbH, and Róisín O'Connor from inScience Communications, Springer Healthcare Ltd (London, UK), and was funded by InterMune International AG. For a full list of acknowledgments and conflicts of interest for all authors of this article, please see the full text online. Copyright © The Author(s) 2014. Creative Commons Attribution Noncommercial License (CC BY-NC).
